# Supplementary material for: Variation in and Hospital Characteristics Associated With the Value of Care for Medicare Beneficiaries With Acute Myocardial Infarction, Heart Failure, and Pneumonia
Source: PubMed Central journal article supplement (PMC6324438; doi:10.1001/jamanetworkopen.2018.3519), 2018-10-19
Supplement: jamanetwopen-1-e183519-s001.pdf [file jamanetwopen-1-e183519-s001.pdf]

## Supplementary Online Content

Desai NR, Ott LS, George EJ, et al. Variation in and hospital characteristics associated with the value of care for Medicare beneficiaries with acute myocardial infarction, heart failure, and pneumonia. *JAMA Netw Open*. 2018;1(6):e183519. doi:10.1001/jamanetworkopen.2018.3519

**eTable 1.** Acute Myocardial Infarction Patient Characteristics and Comorbidities

**eTable 2.** Heart Failure Patient Characteristics and Comorbidities

**eTable 3.** Pneumonia Patient Characteristics and Comorbidities

**eTable 4.** Detailed Payment Information for Acute Myocardial Infarction Overall and Stratified by Median RMSR and RSP

**eTable 5.** Detailed Payment Information for Congestive Heart Failure Overall and Stratified by Median RMSR and RSP

**eTable 6.** Detailed Payment Information for Pneumonia Overall and Stratified by Median RMSR and RSP

This supplementary material has been provided by the authors to give readers additional information about their work.

**eTable 1.** Acute Myocardial Infarction Patient Characteristics and Comorbidities<sup>1</sup>

| Variable                                                                                                   | Frequency (%) | High RSMR: High RSP | High RSMR: Low RSP | Low RSMR: High RSP | Low RSMR: Low RSP |
|------------------------------------------------------------------------------------------------------------|---------------|---------------------|--------------------|--------------------|-------------------|
| Total patients                                                                                             | 460,374       | 109,278             | 69,586             | 188,081            | 93,429            |
| Mean age minus 65 (standard deviation)                                                                     | 13.8 (8.3)    | 13.5 (8.3)          | 14.2 (8.5)         | 13.9 (8.3)         | 13.7 (8.3)        |
| Male                                                                                                       | 51.5          | 52.0                | 50.0               | 51.8               | 51.4              |
| History of Percutaneous Transluminal Coronary Angioplasty (PTCA) (ICD-9 codes V45.82, 00.66, 36.06, 36.07) | 16.9          | 17.4                | 15.4               | 17.6               | 16.1              |
| History of Coronary Artery Bypass Graft (CABG) surgery (ICD-9 codes V45.81, 36.10-36.16)                   | 11.8          | 12.1                | 11.5               | 12.0               | 11.4              |
| Congestive heart failure (CC 80)                                                                           | 29.5          | 29.0                | 30.6               | 29.7               | 29.0              |
| Acute myocardial infarction (CC 81)                                                                        | 13.0          | 12.3                | 13.1               | 13.0               | 13.7              |
| Other acute/subacute forms of ischemic heart disease (CC 82)                                               | 13.0          | 12.6                | 12.6               | 13.5               | 12.9              |
| Anterior myocardial infarction (ICD-9 codes 410.00-410.12)                                                 | 8.2           | 8.5                 | 7.5                | 8.3                | 8.1               |
| Other location of myocardial infarction (ICD-9 codes 410.20-410.62)                                        | 12.4          | 13.1                | 11.4               | 12.4               | 12.3              |
| Coronary atherosclerosis or angina (CC 83-84)                                                              | 85.0          | 86.2                | 81.2               | 86.2               | 84.3              |
| Cardio-respiratory failure or shock (CC 79)                                                                | 10.3          | 10.3                | 10.4               | 10.4               | 10.0              |
| Valvular or rheumatic heart disease (CC 86)                                                                | 31.4          | 30.7                | 29.5               | 32.5               | 31.4              |
| Hypertension (CC 89, 91)                                                                                   | 89.0          | 88.9                | 89.2               | 89.2               | 88.9              |
| Stroke (CC 95-96)                                                                                          | 7.2           | 7.3                 | 7.3                | 7.3                | 6.9               |
| Cerebrovascular disease (CC 97-                                                                            | 20.6          | 20.9                | 20.1               | 20.9               | 19.9              |

<sup>1</sup> Total patients included in both the mortality and payment measure cohort.

ICD-9 codes are the International Classification of Diseases, Ninth Revision, Clinical Modification (ICD-9-CM), based on the World Health Organization's Ninth Revision, International Classification of Diseases (ICD-9). CC codes are CMS Condition Categories. These are groupings of ICD-9-CM diagnosis codes in clinically relevant categories, from the Hierarchical Condition Category (HCC) system [1,2]. The risk variables are created using the grouping but not the hierarchical logic of the system.

[1]. Pope G, Ellis R, Ash A, et al. Diagnostic Cost Group Hierarchical Condition Category Models for Medicare Risk Adjustment. Final Report to the Health Care Financing Administration under Contract Number 500-95-048. 2000. Available at [http://www.cms.hhs.gov/Reports/downloads/pope\\_2000\\_2.pdf](http://www.cms.hhs.gov/Reports/downloads/pope_2000_2.pdf). Accessed July 19 2018.

[2]. Pope G, Kautter J, Ingber M, et al. Evaluation of the CMS-HCC Risk Adjustment Model: Final Report. 2011. Available at [https://www.cms.gov/Medicare/Health-Plans/MedicareAdvtgSpecRateStats/downloads/evaluation\\_risk\\_adj\\_model\\_2011.pdf](https://www.cms.gov/Medicare/Health-Plans/MedicareAdvtgSpecRateStats/downloads/evaluation_risk_adj_model_2011.pdf). Accessed July 19, 2018.

| <b>Variable</b>                                                                             | <b>Frequency (%)</b> | <b>High RSMR: High RSP</b> | <b>High RSMR: Low RSP</b> | <b>Low RSMR: High RSP</b> | <b>Low RSMR: Low RSP</b> |
|---------------------------------------------------------------------------------------------|----------------------|----------------------------|---------------------------|---------------------------|--------------------------|
| 99, 103)                                                                                    |                      |                            |                           |                           |                          |
| Renal failure (CC 131)                                                                      | 26.1                 | 25.7                       | 26.7                      | 26.4                      | 25.7                     |
| Chronic obstructive pulmonary disease (COPD) (CC 108)                                       | 30.3                 | 31.2                       | 31.0                      | 29.6                      | 30.1                     |
| Pneumonia (CC 111-113)                                                                      | 22.7                 | 22.7                       | 23.5                      | 22.9                      | 21.8                     |
| Diabetes mellitus (DM) or DM complications except proliferative retinopathy (CC 15-20, 120) | 46.7                 | 47.0                       | 46.6                      | 46.7                      | 46.2                     |
| Protein-calorie malnutrition (CC 21)                                                        | 6.3                  | 5.9                        | 6.0                       | 6.6                       | 6.5                      |
| Dementia or other specified brain disorders (CC 49-50)                                      | 19.8                 | 19.5                       | 21.4                      | 19.8                      | 19.0                     |
| Hemiplegia, paraplegia, paralysis, functional disability (CC 67-69, 100-102, 177-178)       | 6.3                  | 6.4                        | 6.5                       | 6.4                       | 6.1                      |
| Vascular disease and complications (CC 104-105)                                             | 27.2                 | 27.3                       | 25.6                      | 28.3                      | 26.1                     |
| Metastatic cancer, acute leukemia and other severe cancers (CC 7-8)                         | 3.8                  | 3.7                        | 3.6                       | 3.9                       | 3.7                      |
| Trauma in last year (CC 154-156, 158-162)                                                   | 31.4                 | 31.1                       | 31.8                      | 31.8                      | 30.6                     |
| Major psychiatric disorders (CC 54-56)                                                      | 7.9                  | 7.7                        | 8.2                       | 8.1                       | 7.6                      |
| Chronic liver disease (CC 25-27)                                                            | 1.5                  | 1.5                        | 1.3                       | 1.5                       | 1.4                      |

**eTable 2.** Heart Failure Patient Characteristics and Comorbidities<sup>2</sup>

| Variable                                                                                                   | Frequency (%) | High RSMR: High RSP | High RSMR: Low RSP | Low RSMR: High RSP | Low RSMR: Low RSP |
|------------------------------------------------------------------------------------------------------------|---------------|---------------------|--------------------|--------------------|-------------------|
| Total patients                                                                                             | 883,970       | 236,426             | 145,198            | 371,571            | 130,775           |
| Mean age minus 65 (standard deviation)                                                                     | 16.1 (8.3)    | 16.1 (8.2)          | 16.1 (8.3)         | 16.2 (8.3)         | 15.9 (8.3)        |
| Male                                                                                                       | 44.5          | 45.3                | 43.3               | 44.9               | 43.1              |
| History of Percutaneous Transluminal Coronary Angioplasty (PTCA) (ICD-9 codes V45.82, 00.66, 36.06, 36.07) | 13.5          | 14.3                | 10.9               | 14.6               | 11.8              |
| History of Coronary Artery Bypass Graft (CABG) surgery (ICD-9 codes V45.81, 36.10-36.16)                   | 18.9          | 19.8                | 16.8               | 19.8               | 17.2              |
| Congestive heart failure (CC 80)                                                                           | 73.6          | 72.8                | 72.2               | 74.6               | 73.6              |
| Acute myocardial infarction (CC 81)                                                                        | 9.5           | 9.3                 | 8.8                | 10.0               | 9.1               |
| Other acute/subacute forms of ischemic heart disease (CC 82)                                               | 12.1          | 11.6                | 10.6               | 13.2               | 11.4              |
| Coronary atherosclerosis or angina (CC 83-84)                                                              | 72.6          | 72.8                | 68.0               | 75.1               | 69.9              |
| Cardio-respiratory failure or shock (CC 79)                                                                | 26.5          | 26.7                | 25.0               | 27.4               | 25.3              |
| Valvular or rheumatic heart disease (CC 86)                                                                | 53.2          | 53.6                | 47.7               | 56.3               | 49.9              |
| Hypertension (CC 89, 91)                                                                                   | 93.5          | 93.4                | 92.9               | 93.8               | 93.7              |
| Stroke (CC 95-96)                                                                                          | 9.3           | 9.0                 | 8.3                | 10.0               | 8.8               |
| Renal failure (CC 131)                                                                                     | 49.3          | 48.5                | 46.5               | 51.1               | 48.9              |
| Chronic obstructive pulmonary disease (COPD) (CC 108)                                                      | 48.3          | 48.3                | 48.2               | 48.0               | 49.1              |
| Pneumonia (CC 111-113)                                                                                     | 45.0          | 44.4                | 43.2               | 46.1               | 44.5              |
| Diabetes mellitus (DM) or DM complications except proliferative                                            | 53.8          | 52.8                | 52.3               | 54.9               | 53.8              |

<sup>2</sup> Total patients included in both the mortality and payment measure cohort.

ICD-9 codes are the International Classification of Diseases, Ninth Revision, Clinical Modification (ICD-9-CM), based on the World Health Organization's Ninth Revision, International Classification of Diseases (ICD-9). CC codes are CMS Condition Categories. These are groupings of ICD-9-CM diagnosis codes in clinically relevant categories, from the Hierarchical Condition Category (HCC) system [1,2]. The risk variables are created using the grouping but not the hierarchical logic of the system.

[1]. Pope G, Ellis R, Ash A, et al. Diagnostic Cost Group Hierarchical Condition Category Models for Medicare Risk Adjustment. Final Report to the Health Care Financing Administration under Contract Number 500-95-048. 2000. Available at [http://www.cms.hhs.gov/Reports/downloads/pope\\_2000\\_2.pdf](http://www.cms.hhs.gov/Reports/downloads/pope_2000_2.pdf). Accessed July 19 2018.

[2]. Pope G, Kautter J, Ingber M, et al. Evaluation of the CMS-HCC Risk Adjustment Model: Final Report. 2011. Available at [https://www.cms.gov/Medicare/Health-Plans/MedicareAdvtgSpecRateStats/downloads/evaluation\\_risk\\_adj\\_model\\_2011.pdf](https://www.cms.gov/Medicare/Health-Plans/MedicareAdvtgSpecRateStats/downloads/evaluation_risk_adj_model_2011.pdf). Accessed July 19, 2018.

| <b>Variable</b>                                                                       | <b>Frequency (%)</b> | <b>High RSMR: High RSP</b> | <b>High RSMR: Low RSP</b> | <b>Low RSMR: High RSP</b> | <b>Low RSMR: Low RSP</b> |
|---------------------------------------------------------------------------------------|----------------------|----------------------------|---------------------------|---------------------------|--------------------------|
| retinopathy (CC 15-20, 120)                                                           |                      |                            |                           |                           |                          |
| Protein-calorie malnutrition (CC 21)                                                  | 10.1                 | 9.1                        | 8.7                       | 11.3                      | 10.2                     |
| Dementia or other specified brain disorders (CC 49-50)                                | 24.9                 | 24.0                       | 24.1                      | 25.7                      | 24.8                     |
| Hemiplegia, paraplegia, paralysis, functional disability (CC 67-69, 100-102, 177-178) | 8.5                  | 8.2                        | 7.9                       | 9.0                       | 8.4                      |
| Vascular disease and complications (CC 104-105)                                       | 38.4                 | 37.4                       | 33.4                      | 41.7                      | 36.0                     |
| Metastatic cancer, acute leukemia and other severe cancers (CC 7-8)                   | 4.4                  | 4.3                        | 4.0                       | 4.7                       | 4.1                      |
| Trauma in last year (CC 154-156, 158-162)                                             | 40.4                 | 40.5                       | 39.3                      | 41.0                      | 39.5                     |
| Major psychiatric disorders (CC 54-56)                                                | 10.7                 | 10.5                       | 10.1                      | 11.2                      | 10.3                     |
| Chronic liver disease (CC 25-27)                                                      | 3.1                  | 2.8                        | 2.6                       | 3.5                       | 2.9                      |

**eTable 3.** Pneumonia Patient Characteristics and Comorbidities<sup>3</sup>

| Variable                                                                                                   | Frequency (%) | High RSMR: High RSP | High RSMR: Low RSP | Low RSMR: High RSP | Low RSMR: Low RSP |
|------------------------------------------------------------------------------------------------------------|---------------|---------------------|--------------------|--------------------|-------------------|
| Total patients                                                                                             | 895,016       | 238,725             | 168,633            | 304,874            | 182,784           |
| Mean age minus 65 (standard deviation)                                                                     | 15.3 (8.4)    | 15.2 (8.3)          | 15.3 (8.4)         | 15.5 (8.4)         | 15.3 (8.4)        |
| Male                                                                                                       | 44.6          | 44.5                | 44.9               | 44.5               | 44.6              |
| History of Percutaneous Transluminal Coronary Angioplasty (PTCA) (ICD-9 codes V45.82, 00.66, 36.06, 36.07) | 7.6           | 7.8                 | 6.7                | 8.0                | 7.3               |
| History of Coronary Artery Bypass Graft (CABG) surgery (ICD-9 codes V45.81, 36.10-36.16)                   | 9.3           | 9.5                 | 8.6                | 9.7                | 9.1               |
| Congestive heart failure (CC 80)                                                                           | 38.3          | 38.2                | 37.3               | 39.1               | 38.0              |
| Acute myocardial infarction (CC 81)                                                                        | 3.9           | 3.9                 | 3.5                | 4.1                | 3.7               |
| Other acute/subacute forms of ischemic heart disease (CC 82)                                               | 5.8           | 5.8                 | 5.0                | 6.4                | 5.6               |
| Coronary atherosclerosis or angina (CC 83-84)                                                              | 49.5          | 49.7                | 46.9               | 51.3               | 48.5              |
| Cardio-respiratory failure or shock (CC 79)                                                                | 21.8          | 22.3                | 19.7               | 23.0               | 20.9              |
| Hypertension (CC 89, 91)                                                                                   | 87.3          | 87.5                | 86.3               | 87.9               | 87.0              |
| Stroke (CC 95-96)                                                                                          | 8.9           | 9.2                 | 8.2                | 9.3                | 8.4               |
| Cerebrovascular disease (CC 97-99, 103)                                                                    | 21.7          | 22.1                | 20.2               | 22.7               | 20.9              |
| Renal failure (CC 131)                                                                                     | 29.8          | 29.8                | 27.5               | 31.3               | 29.4              |
| Chronic obstructive pulmonary disease (COPD) (CC 108)                                                      | 54.3          | 55.1                | 54.7               | 53.3               | 54.4              |
| Pneumonia (CC 111-113)                                                                                     | 41.1          | 41.4                | 40.5               | 41.5               | 40.3              |
| Protein-calorie malnutrition (CC 21)                                                                       | 12.8          | 12.5                | 10.6               | 14.1               | 13.0              |

<sup>3</sup> Total patients included in both the mortality and payment measure cohort.

ICD-9 codes are the International Classification of Diseases, Ninth Revision, Clinical Modification (ICD-9-CM), based on the World Health Organization's Ninth Revision, International Classification of Diseases (ICD-9). CC codes are CMS Condition Categories. These are groupings of ICD-9-CM diagnosis codes in clinically relevant categories, from the Hierarchical Condition Category (HCC) system [1,2]. The risk variables are created using the grouping but not the hierarchical logic of the system.

[1]. Pope G, Ellis R, Ash A, et al. Diagnostic Cost Group Hierarchical Condition Category Models for Medicare Risk Adjustment. Final Report to the Health Care Financing Administration under Contract Number 500-95-048. 2000. Available at [http://www.cms.hhs.gov/Reports/downloads/pope\\_2000\\_2.pdf](http://www.cms.hhs.gov/Reports/downloads/pope_2000_2.pdf). Accessed July 19 2018.

[2]. Pope G, Kautter J, Ingber M, et al. Evaluation of the CMS-HCC Risk Adjustment Model: Final Report. 2011. Available at [https://www.cms.gov/Medicare/Health-Plans/MedicareAdvtgSpecRateStats/downloads/evaluation\\_risk\\_adj\\_model\\_2011.pdf](https://www.cms.gov/Medicare/Health-Plans/MedicareAdvtgSpecRateStats/downloads/evaluation_risk_adj_model_2011.pdf). Accessed July 19, 2018.

| <b>Variable</b>                                                                       | <b>Frequency (%)</b> | <b>High RSMR: High RSP</b> | <b>High RSMR: Low RSP</b> | <b>Low RSMR: High RSP</b> | <b>Low RSMR: Low RSP</b> |
|---------------------------------------------------------------------------------------|----------------------|----------------------------|---------------------------|---------------------------|--------------------------|
| Dementia or other specified brain disorders (CC 49-50)                                | 30.7                 | 30.8                       | 30.3                      | 31.2                      | 29.9                     |
| Hemiplegia, paraplegia, paralysis, functional disability (CC 67-69, 100-102, 177-178) | 8.7                  | 8.8                        | 8.3                       | 9.1                       | 8.4                      |
| Vascular disease and complications (CC 104-105)                                       | 31.4                 | 31.1                       | 28.0                      | 34.1                      | 30.3                     |
| Metastatic cancer, acute leukemia, and other severe cancers (CC 7-8)                  | 9.2                  | 9.1                        | 8.1                       | 10.1                      | 8.9                      |
| Trauma in last year (CC 154-156, 158-162)                                             | 40.7                 | 40.8                       | 39.8                      | 41.5                      | 40.2                     |
| Major psychiatric disorders (CC 54-56)                                                | 13.8                 | 14.0                       | 13.3                      | 14.4                      | 13.1                     |
| Chronic liver disease (CC 25-27)                                                      | 2.1                  | 2.0                        | 1.8                       | 2.4                       | 2.0                      |
| Severe hematological disorders (CC 44)                                                | 2.7                  | 2.6                        | 2.2                       | 3.1                       | 2.5                      |
| Parkinson's or Huntington's diseases (CC 73)                                          | 4.0                  | 4.1                        | 3.9                       | 4.1                       | 3.8                      |
| Fibrosis of lung or other chronic lung disorders (CC 109)                             | 14.6                 | 14.5                       | 13.1                      | 15.7                      | 14.4                     |
| Iron deficiency or other unspecified anemias and blood disease (CC 47)                | 58.0                 | 57.9                       | 55.3                      | 60.2                      | 57.2                     |
| Depression (CC 58)                                                                    | 24.6                 | 24.2                       | 24.5                      | 24.6                      | 25.3                     |
| Seizure disorders and convulsions (CC 74)                                             | 5.7                  | 5.9                        | 5.3                       | 6.0                       | 5.4                      |
| Asthma (CC 110)                                                                       | 11.8                 | 11.3                       | 11.0                      | 12.6                      | 11.8                     |
| Vertebral fractures (CC 157)                                                          | 5.1                  | 5.1                        | 4.9                       | 5.3                       | 5.1                      |

**eTable 4.** Detailed Payment Information for Acute Myocardial Infarction Overall and Stratified by Median RMSR and RSP

| Care Setting/Service                        | Overall                  | High RMSR:<br>High RSP   | High RMSR:<br>Low RSP   | Low RMSR:<br>High RSP    | Low RMSR:<br>Low RSP     |
|---------------------------------------------|--------------------------|--------------------------|-------------------------|--------------------------|--------------------------|
| <b>Index Hospitalization</b>                |                          |                          |                         |                          |                          |
| # of patients                               | 444,105                  | 106,528                  | 63,141                  | 184,856                  | 89,580                   |
| Median (IQR), \$                            | 12448<br>(10025 - 18700) | 12677<br>(10582 - 19587) | 11837<br>(7936 - 14149) | 12638<br>(10546 - 19405) | 12058<br>(8442 - 15246)  |
| <b>Post-Acute Care (total)</b>              |                          |                          |                         |                          |                          |
| # of patients                               | 387,775                  | 91,384                   | 53,469                  | 164,042                  | 78,880                   |
| Median (IQR), \$                            | 1948<br>(364 - 9202)     | 2208<br>(377 - 9983)     | 1656<br>(324 - 8170)    | 2113<br>(396 - 9707)     | 1515<br>(320 - 7799)     |
| <b>Readmission (Facility and Physician)</b> |                          |                          |                         |                          |                          |
| # of patients                               | 153,978                  | 38,645                   | 20,134                  | 66,378                   | 28,821                   |
| Median (IQR), \$                            | 2060<br>(634 - 5871)     | 2052<br>(649 - 5874)     | 1933<br>(579 - 5871)    | 2115<br>(672 - 5861)     | 2022<br>(587 - 5861)     |
| <b>Skilled Nursing Facilities</b>           |                          |                          |                         |                          |                          |
| # of patients                               | 90,874                   | 22,150                   | 11,825                  | 39,945                   | 16,954                   |
| Median (IQR), \$                            | 7895<br>(3624 - 11438)   | 7911<br>(3715 - 11421)   | 7505<br>(3261 - 11134)  | 8073<br>(3720 - 11623)   | 7706<br>(3555 - 11151)   |
| <b>Hospice</b>                              |                          |                          |                         |                          |                          |
| # of patients                               | 15,806                   | 4,100                    | 2,579                   | 6,145                    | 2,982                    |
| Median (IQR), \$                            | 2440<br>(1197 - 3910)    | 2470<br>(1214 - 4001)    | 2321<br>(1077 - 3844)   | 2406<br>(1197 - 3899)    | 2462<br>(1137 - 3889)    |
| <b>Home Health Agency</b>                   |                          |                          |                         |                          |                          |
| # of patients                               | 87,735                   | 20,568                   | 10,895                  | 39,415                   | 16,857                   |
| Median (IQR)                                | 1109<br>(490 - 1891)     | 1092<br>(479 - 1890)     | 1090<br>(486 - 1864)    | 1123<br>(484 - 1903)     | 1107<br>(516 - 1877)     |
| <b>Non-Acute Inpatient Settings</b>         |                          |                          |                         |                          |                          |
| # of patients                               | 18,548                   | 5,340                    | 1,984                   | 8,590                    | 2,634                    |
| Median (IQR), \$                            | 15137<br>(11043 - 20066) | 15504<br>(11298 - 20082) | 14722<br>(9897 - 19440) | 15301<br>(11257 - 20185) | 14569<br>(10739 - 19548) |
| <b>Observation Stay</b>                     |                          |                          |                         |                          |                          |
| # of patients                               | 17,250                   | 4,242                    | 2,433                   | 7,093                    | 3,482                    |
| Median (IQR), \$                            | 1249<br>(181 - 1946)     | 1222<br>(181 - 1959)     | 1230<br>(181 - 1944)    | 1258<br>(199 - 1936)     | 1271<br>(181 - 1946)     |
| <b>Emergency Department</b>                 |                          |                          |                         |                          |                          |



|                                    |                 |                 |                 |                 |                 |
|------------------------------------|-----------------|-----------------|-----------------|-----------------|-----------------|
| # of patients                      | 89,377          | 21,538          | 12,474          | 37,441          | 17,924          |
| \$ per patient                     | 236 (177 - 591) | 231 (178 - 573) | 246 (177 - 629) | 231 (177 - 565) | 243 (177 - 637) |
| <b>Outpatient Physician Visits</b> |                 |                 |                 |                 |                 |
| # of patients                      | 259,486         | 60,681          | 36,076          | 109,862         | 52,867          |
| Median (IQR), \$                   | 182 (105 - 313) | 182 (105 - 314) | 176 (105 - 297) | 195 (105 - 323) | 176 (105 - 295) |
| <b>Other Outpatient Settings</b>   |                 |                 |                 |                 |                 |
| # of patients                      | 241,824         | 55,303          | 33,565          | 102,119         | 50,837          |
| Median (IQR), \$                   | 100 (33 - 337)  | 97 (31 - 344)   | 97 (32 - 330)   | 101 (34 - 337)  | 102 (35 - 334)  |
| <b>Miscellaneous</b>               |                 |                 |                 |                 |                 |
| # of patients                      | 160,721         | 38,307          | 21,523          | 69,301          | 31,590          |
| Median (IQR), \$                   | 300 (147 - 577) | 300 (174 - 603) | 300 (141 - 544) | 300 (150 - 576) | 300 (135 - 560) |

**eTable 5.** Detailed Payment Information for Congestive Heart Failure Overall and Stratified by Median RMSR and RSP

| Care Setting/Service                        | Overall                  | High RSMR:<br>High RSP   | High RSMR:<br>Low RSP   | Low RSMR:<br>High RSP    | Low RSMR:<br>Low RSP    |
|---------------------------------------------|--------------------------|--------------------------|-------------------------|--------------------------|-------------------------|
| <b>Index Hospitalization</b>                |                          |                          |                         |                          |                         |
| # of patients                               | 871,246                  | 233,376                  | 141,722                 | 368,782                  | 127,366                 |
| Median (IQR), \$                            | 7309<br>(6246 - 9776)    | 7432<br>(6283 - 9812)    | 6733<br>(6002 - 9299)   | 7770<br>(6414 - 10163)   | 6802<br>(6057 - 9363)   |
| <b>Post-Acute Care (total)</b>              |                          |                          |                         |                          |                         |
| # of patients                               | 814,278                  | 217,465                  | 130,760                 | 346,597                  | 119,456                 |
| Median (IQR), \$                            | 2829<br>(644 - 10566)    | 3084<br>(698 - 11126)    | 2458<br>(542 - 9231)    | 3007<br>(709 - 11198)    | 2368<br>(527 - 9099)    |
| <b>Readmission (Facility and Physician)</b> |                          |                          |                         |                          |                         |
| # of patients                               | 331,486                  | 89,072                   | 48,437                  | 147,785                  | 46,192                  |
| Median (IQR), \$                            | 2322<br>(696 - 6060)     | 2260<br>(694 - 6126)     | 1942<br>(546 - 5949)    | 2539<br>(810 - 6203)     | 2026<br>(584 - 5904)    |
| <b>Skilled Nursing Facilities</b>           |                          |                          |                         |                          |                         |
| # of patients                               | 248,240                  | 68,852                   | 39,259                  | 106,369                  | 33,760                  |
| Median (IQR), \$                            | 8395<br>(3617 - 11884)   | 8627<br>(3840 - 12067)   | 7947<br>(3335 - 11390)  | 8558<br>(3735 - 12093)   | 7895<br>(3178 - 11401)  |
| <b>Hospice</b>                              |                          |                          |                         |                          |                         |
| # of patients                               | 55,091                   | 16,652                   | 9,906                   | 20,952                   | 7,581                   |
| Median (IQR), \$                            | 2393<br>(1105 - 3770)    | 2406<br>(1172 - 3825)    | 2244<br>(1047 - 3694)   | 2393<br>(1203 - 3825)    | 2502<br>(1197 - 3756)   |
| <b>Home Health Agency</b>                   |                          |                          |                         |                          |                         |
| # of patients                               | 235,272                  | 61,405                   | 33,418                  | 107,836                  | 32,613                  |
| Median (IQR)                                | 1052<br>(447 - 1820)     | 1073<br>(457 - 1854)     | 1088<br>(489 - 1852)    | 1028<br>(413 - 1794)     | 1054<br>(466 - 1795)    |
| <b>Non-Acute Inpatient Settings</b>         |                          |                          |                         |                          |                         |
| # of patients                               | 28,426                   | 8,885                    | 2,370                   | 14,908                   | 2,263                   |
| Median (IQR), \$                            | 16438<br>(10858 - 22177) | 16685<br>(11569 - 21766) | 15074<br>(8779 - 20778) | 16820<br>(11121 - 22986) | 14807<br>(8608 - 20585) |
| <b>Observation Stay</b>                     |                          |                          |                         |                          |                         |
| # of patients                               | 26,256                   | 7,006                    | 4,635                   | 10,516                   | 4,099                   |
| Median (IQR), \$                            | 1247<br>(181 - 1865)     | 1240<br>(181 - 1884)     | 1292<br>(203 - 1869)    | 1222<br>(181 - 1850)     | 1281<br>(202 - 1891)    |
| <b>Emergency Department</b>                 |                          |                          |                         |                          |                         |

|                                    |                 |                 |                 |                 |                 |
|------------------------------------|-----------------|-----------------|-----------------|-----------------|-----------------|
| # of patients                      | 189,532         | 50,983          | 30,628          | 79,883          | 28,038          |
| \$ per patient                     | 229 (177 - 569) | 235 (177 - 594) | 267 (176 - 668) | 226 (177 - 486) | 239 (175 - 625) |
| <b>Outpatient Physician Visits</b> |                 |                 |                 |                 |                 |
| # of patients                      | 515,186         | 138,895         | 81,896          | 220,023         | 74,372          |
| Median (IQR), \$                   | 198 (105 - 333) | 200 (105 - 334) | 177 (105 - 309) | 209 (105 - 350) | 179 (105 - 314) |
| <b>Other Outpatient Settings</b>   |                 |                 |                 |                 |                 |
| # of patients                      | 545,940         | 145,465         | 89,236          | 228,946         | 82,293          |
| Median (IQR), \$                   | 97 (33 - 322)   | 96 (32 - 318)   | 92 (32 - 292)   | 100 (33 - 347)  | 93 (33 - 303)   |
| <b>Miscellaneous</b>               |                 |                 |                 |                 |                 |
| # of patients                      | 453,159         | 118,663         | 70,318          | 199,508         | 64,670          |
| Median (IQR), \$                   | 296 (165 - 502) | 296 (168 - 502) | 281 (174 - 496) | 296 (166 - 521) | 281 (147 - 496) |

**eTable 6.** Detailed Payment Information for Pneumonia Overall and Stratified by Median RMSR and RSP

| Care Setting/Service                        | Overall                  | High RMSR:<br>High RSP   | High RMSR:<br>Low RSP   | Low RMSR:<br>High RSP    | Low RMSR:<br>Low RSP    |
|---------------------------------------------|--------------------------|--------------------------|-------------------------|--------------------------|-------------------------|
| <b>Index Hospitalization</b>                |                          |                          |                         |                          |                         |
| # of patients                               | 887,983                  | 236,948                  | 166,783                 | 303,281                  | 180,971                 |
| Median (IQR), \$                            | 6678<br>(5971 - 9334)    | 6892<br>(6029 - 9507)    | 6315<br>(5563 - 8851)   | 7121<br>(6124 - 9682)    | 6440<br>(5881 - 9034)   |
| <b>Post-Acute Care (total)</b>              |                          |                          |                         |                          |                         |
| # of patients                               | 814,584                  | 215,990                  | 150,197                 | 281,599                  | 166,798                 |
| Median (IQR), \$                            | 2651<br>(479 - 10602)    | 3059<br>(533 - 11502)    | 2126<br>(386 - 9055)    | 3018<br>(578 - 11529)    | 2168<br>(399 - 8979)    |
| <b>Readmission (Facility and Physician)</b> |                          |                          |                         |                          |                         |
| # of patients                               | 285,717                  | 79,934                   | 48,260                  | 103,545                  | 53,978                  |
| Median (IQR), \$                            | 2064<br>(610 - 6194)     | 1994<br>(598 - 6133)     | 1779<br>(485 - 6165)    | 2306<br>(740 - 6307)     | 1886<br>(544 - 6052)    |
| <b>Skilled Nursing Facilities</b>           |                          |                          |                         |                          |                         |
| # of patients                               | 284,453                  | 79,431                   | 50,389                  | 101,249                  | 53,384                  |
| Median (IQR), \$                            | 8269<br>(3334 - 11912)   | 8587<br>(3618 - 12209)   | 7616<br>(2890 - 11295)  | 8604<br>(3597 - 12242)   | 7768<br>(2972 - 11430)  |
| <b>Hospice</b>                              |                          |                          |                         |                          |                         |
| # of patients                               | 44,605                   | 13,325                   | 8,573                   | 14,575                   | 8,132                   |
| Median (IQR), \$                            | 2148<br>(970 - 3590)     | 2139<br>(980 - 3609)     | 2041<br>(915 - 3399)    | 2189<br>(1053 - 3657)    | 2199<br>(1047 - 3590)   |
| <b>Home Health Agency</b>                   |                          |                          |                         |                          |                         |
| # of patients                               | 190,735                  | 49,517                   | 30,587                  | 73,251                   | 37,380                  |
| Median (IQR)                                | 1111<br>(449 - 1939)     | 1087<br>(441 - 1920)     | 1109<br>(473 - 1926)    | 1099<br>(437 - 1932)     | 1162<br>(478 - 1984)    |
| <b>Non-Acute Inpatient Settings</b>         |                          |                          |                         |                          |                         |
| # of patients                               | 31,300                   | 10,830                   | 2,779                   | 14,254                   | 3,437                   |
| Median (IQR), \$                            | 17355<br>(11228 - 24758) | 17710<br>(11878 - 24784) | 14737<br>(8248 - 21994) | 18163<br>(11934 - 26116) | 15056<br>(8202 - 21496) |
| <b>Observation Stay</b>                     |                          |                          |                         |                          |                         |
| # of patients                               | 20,095                   | 5,135                    | 4,062                   | 6,722                    | 4,176                   |
| Median (IQR), \$                            | 1352<br>(217 - 2033)     | 1323<br>(213 - 2024)     | 1374<br>(247 - 2051)    | 1339<br>(214 - 1994)     | 1387<br>(247 - 2078)    |
| <b>Emergency Department</b>                 |                          |                          |                         |                          |                         |
| # of patients                               | 163,817                  | 44,042                   | 30,268                  | 56,400                   | 33,107                  |

|                                    |                 |                 |                 |                 |                 |
|------------------------------------|-----------------|-----------------|-----------------|-----------------|-----------------|
| \$ per patient                     | 240 (176 - 598) | 238 (177 - 597) | 295 (176 - 695) | 229 (177 - 531) | 250 (175 - 623) |
| <b>Outpatient Physician Visits</b> |                 |                 |                 |                 |                 |
| # of patients                      | 472,907         | 124,379         | 86,443          | 163,881         | 98,204          |
| Median (IQR), \$                   | 173 (105 - 303) | 173 (105 - 306) | 152 (104 - 277) | 176 (105 - 318) | 163 (105 - 290) |
| <b>Other Outpatient Settings</b>   |                 |                 |                 |                 |                 |
| # of patients                      | 488,785         | 126,814         | 91,622          | 167,216         | 103,133         |
| Median (IQR), \$                   | 84 (27 - 300)   | 81 (27 - 307)   | 77 (27 - 269)   | 88 (28 - 322)   | 85 (28 - 292)   |
| <b>Miscellaneous</b>               |                 |                 |                 |                 |                 |
| # of patients                      | 457,734         | 121,504         | 81,487          | 163,767         | 90,976          |
| Median (IQR), \$                   | 293 (153 - 489) | 296 (166 - 496) | 266 (140 - 489) | 296 (174 - 496) | 271 (133 - 484) |
